# Supplementary material
Source: PubMed Central journal article supplement (PMC3123023)
Supplement: supp_blood-2011-01-329417_Document1.pdf [file supp_blood-2011-01-329417_Document1.pdf]

**Table S1. List of primers for RT-PCR**

| <b>Sequence</b> | <b>Sequence of sense and anti-sense primers</b>                  |
|-----------------|------------------------------------------------------------------|
| $\beta$ -actin  | 5'-GATCATTGCTCCTCCTGAGC-3'<br>5'-CGTCATACTCCTGCTTGCTG-3'         |
| Lef1            | 5'-AATGAGAGCGAATGTCGTTGC-3'<br>5'-GCTGTCTTTCTTTCCGTGCTA-3'       |
| TCF7            | 5'-GAGGAGCAGGACGACAAGAG-3'<br>5'-TTCACGAGCGACGACTTGAG-3'         |
| PPAR $\gamma$   | 5'-CCTATTGACCCAGAAAGCGATT-3'<br>5'-CATTACGGAGAGATCCACGGA-3'      |
| RXR $\alpha$    | 5'-GGACTGCCTGATTGACAAGC-3'<br>5'-TTCAGCCCCATGTTTGCCTC-3'         |
| CD44            | 5'-CCTGGGATTGGTTTTTCATGGT-3'<br>5'-CCAGCCTGCTGAGATGGTATTT-3'     |
| IL-10           | 5'-AAGCTGAGAACCAAGACCCAGACA-3'<br>5'-AAAGGCATTCTTCACCTGCTCCAC-3' |
| IL-9            | 5'-AGGCCAGGGGTGTCCAACCT-3'<br>5'-GCGTTGCCTGCCGTGGTTTC-3'         |
| IL-13           | 5'-CACTGGGCCTCATGGCGCTT-3'<br>5'-TGGCACTGCAGCCTGACACG-3'         |
| VEGF $\alpha$   | 5'-GATGCGGGGGCTGCTGCAAT-3'<br>5'-CCGCTCTGAGCAAGGCCAC-3'          |
| IL-2            | 5'-AACTCCTGTCTTGCAATTGCAC-3'<br>5'-GCTCCAGTTGTAGCTGTGTTT-3'      |

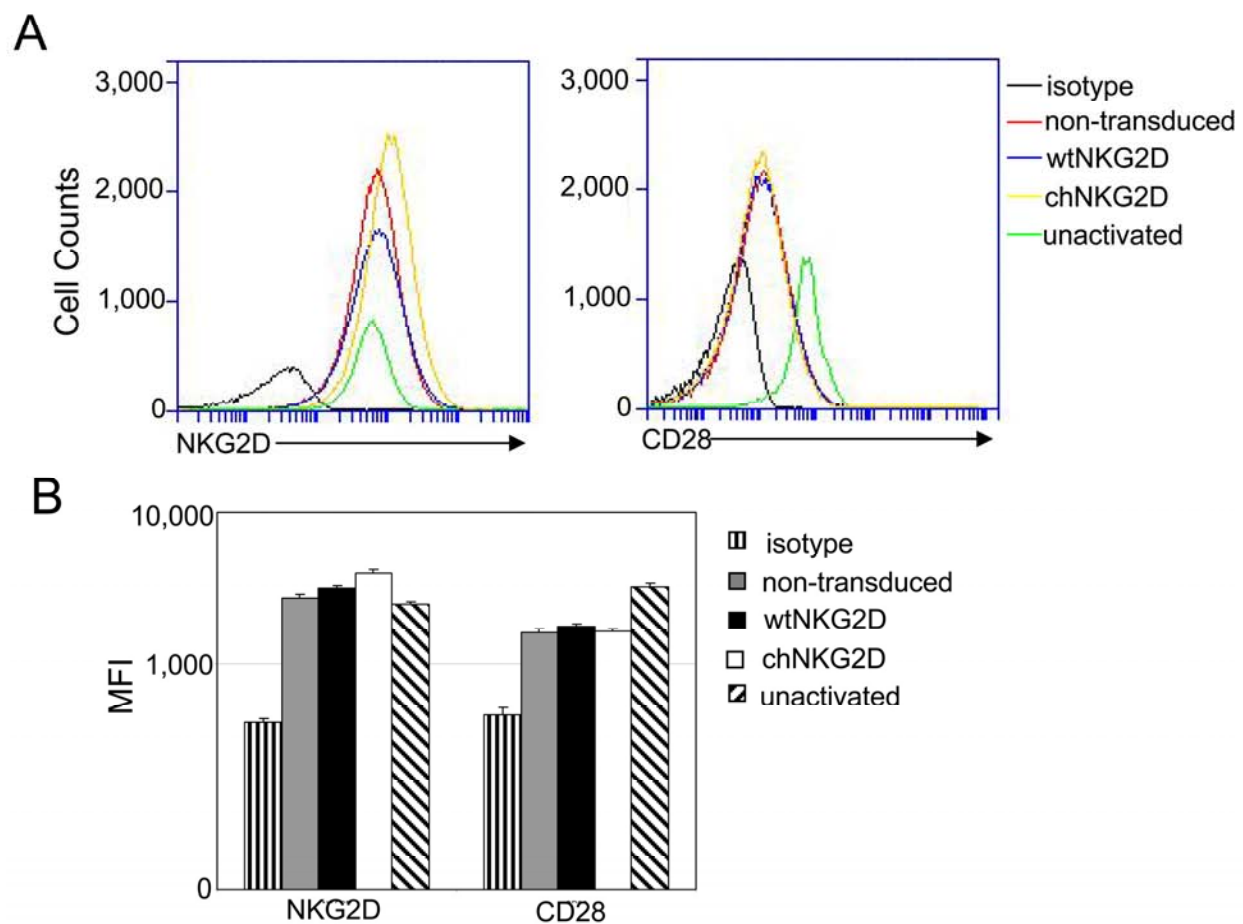

**Figure S1. NKG2D and CD28 expression on effector CD8<sup>+</sup> T cells**

(A) Representative histograms or (b) MFI of CD8<sup>+</sup> T cells transduced with wtNKG2D or chNKG2D receptors, activated and non-transduced, or unactivated (gated on CD3<sup>+</sup>CD8<sup>+</sup> cells) were stained with antibodies specific for NKG2D, CD28, or isotype controls. Data shown in (B) are an average of three donors + s.d.

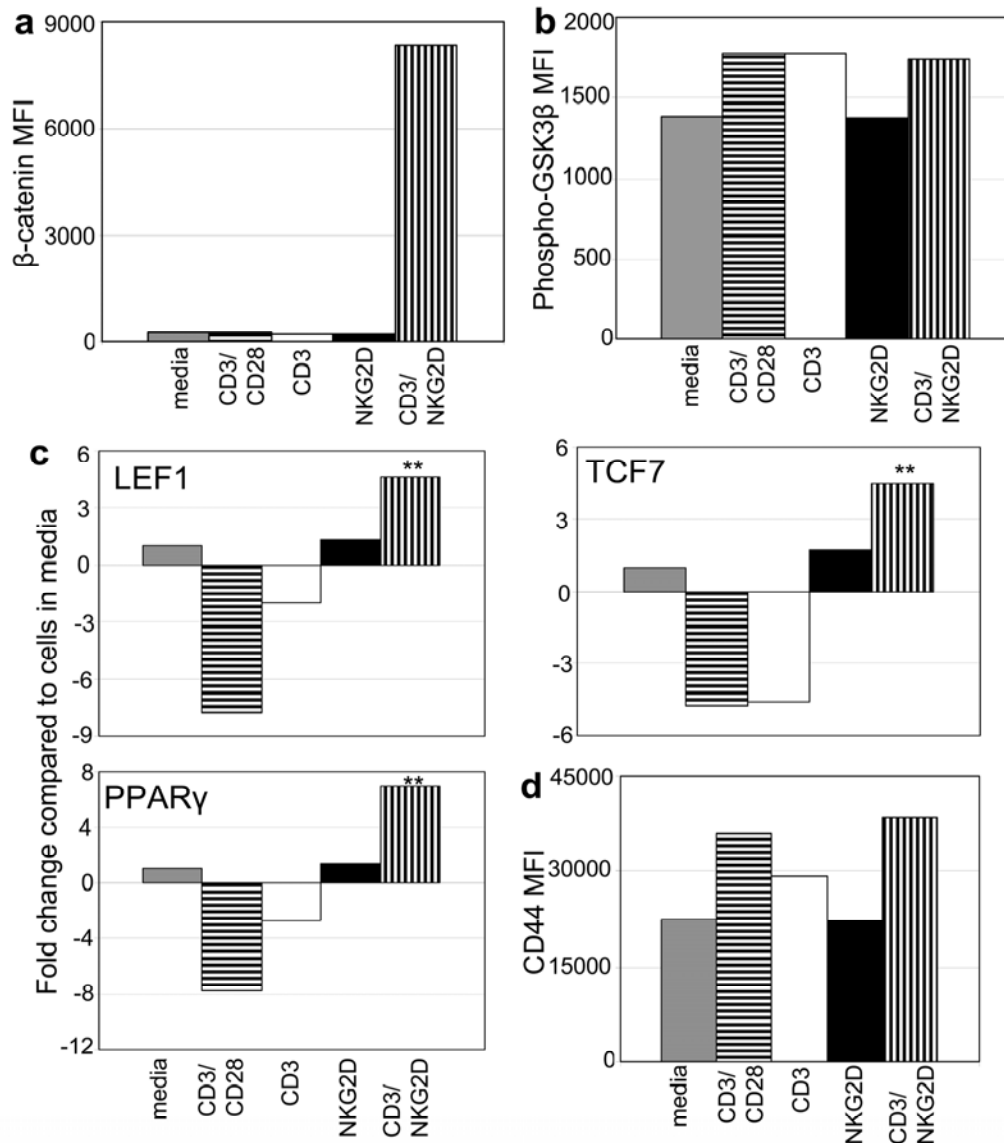

**Figure S2. Stimulation of activated T cells through NKG2D and CD3 activates  $\beta$ -catenin**  
 Activated, non-transduced T cells were stimulated with media, anti-CD3/CD28, anti-CD3-, anti-NKG2D-, or anti-CD3 and anti-NKG2D antibody coated beads. (A)  $\beta$ -catenin was measured with anti-  $\beta$ -catenin antibodies 5 hours after stimulation. (B) Phosphorylated (Ser9) GSK3 $\beta$ -expression was measured 30 minutes after stimulation. (C) Eight hours after stimulation, gene expression was determined by RT-PCR. Data are shown as the fold change in gene expression compared to T cells cultured in media. Stimulation of T cells through CD3/NKG2D significantly changed gene expression compared to CD3 stimulation (\*\*-p<0.05). (D) CD44 cell surface expression was determined by FACS 24 hours after stimulation. Data shown were obtained from one donor and are representative of data from three donors.

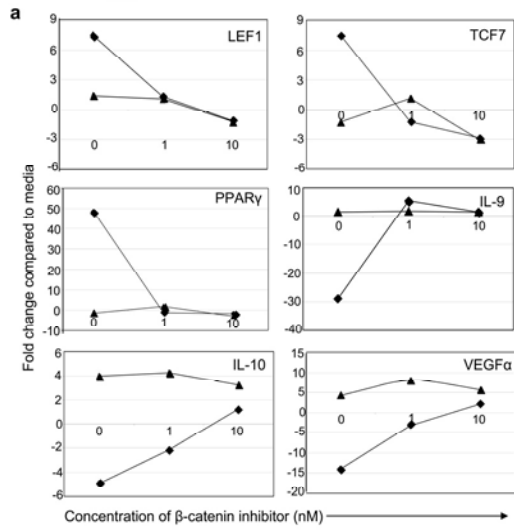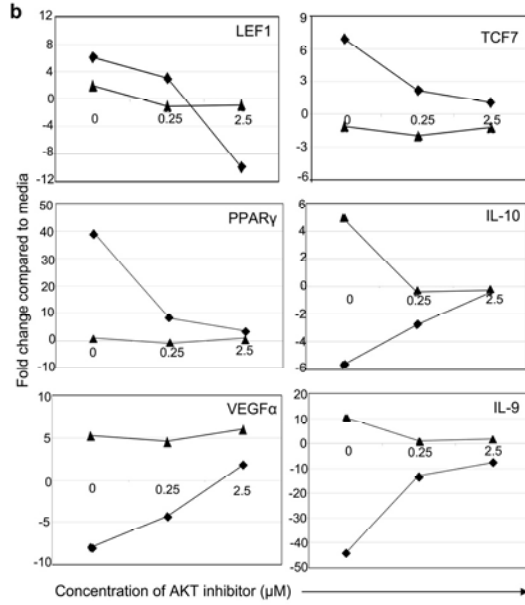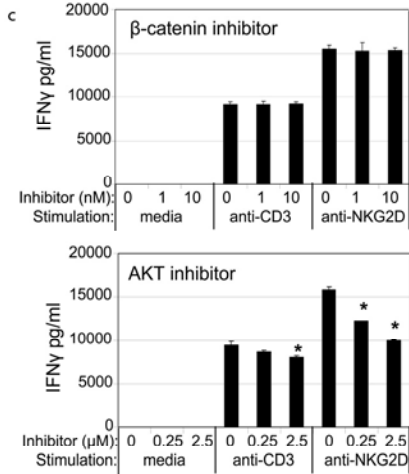

**Figure S3.  $\beta$ -catenin is required for altered expression of anti-inflammatory cytokines but not required for secretion of IFN $\gamma$**

chNKG2D T cells were stimulated with anti-CD3- or anti-NKG2D-coated beads in the presence of (A,C)  $\beta$ -catenin inhibitor XAV939 (1nM, 10nM) or DMSO vehicle control (0nM) or (B,C) AKT inhibitor API-2 (0.25 $\mu$ M, 2.5  $\mu$ M) or DMSO vehicle control (0  $\mu$ M). (a,b) After 8 hours, gene expression was determined by RT-PCR. Data are shown as the fold change in gene expression compared to T cells cultured in media at each concentration of inhibitor. (C) After 24 hours, secretion of IFN $\gamma$  was determined in cell-free supernatants by ELISA. Data are shown as mean + s.d., were obtained from one donor, and are representative of data at least two donors. Inhibiting AKT significantly reduced IFN $\gamma$  secretion when chNKG2D T cells were stimulated through CD3 or NKG2D (\*- p<0.05).

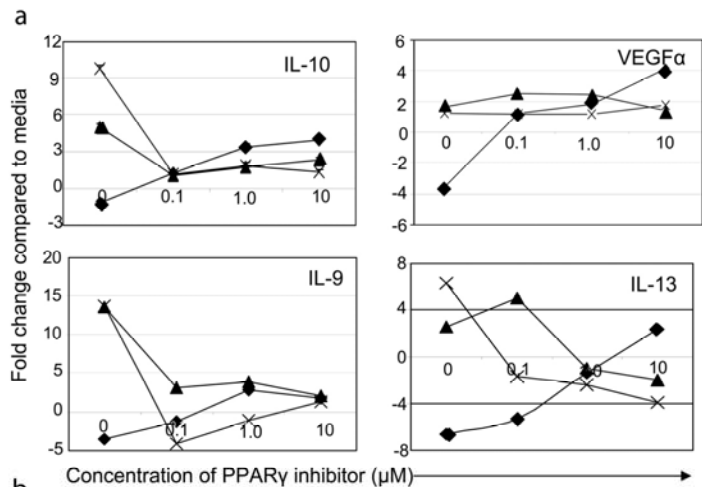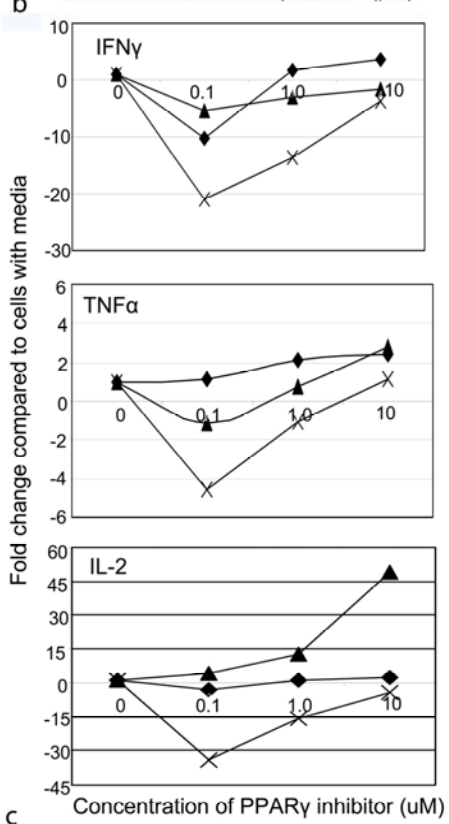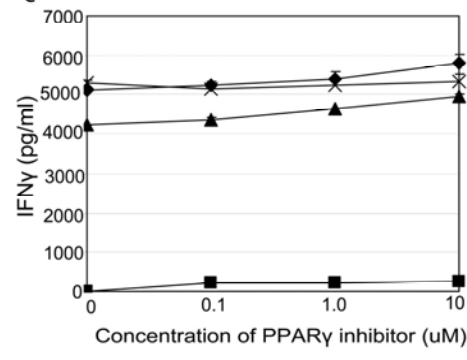

**Figure S4. PPAR $\gamma$  is required for altered expression of anti-inflammatory cytokines but not required for the expression of IFN $\gamma$ , TNF $\alpha$ , or IL-2**

ChNKG2D T cells were stimulated with anti-CD3/CD28- (X), anti-CD3- (triangles) or anti-NKG2D- (diamonds) coated beads or media (squares) in the presence of PPAR $\gamma$  inhibitor GW9662 (0.1 $\mu$ M, 1.0  $\mu$ M, 10  $\mu$ M) or DMSO vehicle control (0  $\mu$ M). (A) After 8 hours, gene expression was determined by RT-PCR. Data are shown as the fold change in gene expression compared to T cells cultured in media at each concentration of inhibitor. (B) After 24 hours, secretion of IFN $\gamma$  was determined in cell-free supernatants by ELISA. Data are shown as mean + s.d. Data shown were obtained from one donor and are representative of data from at least two donors.

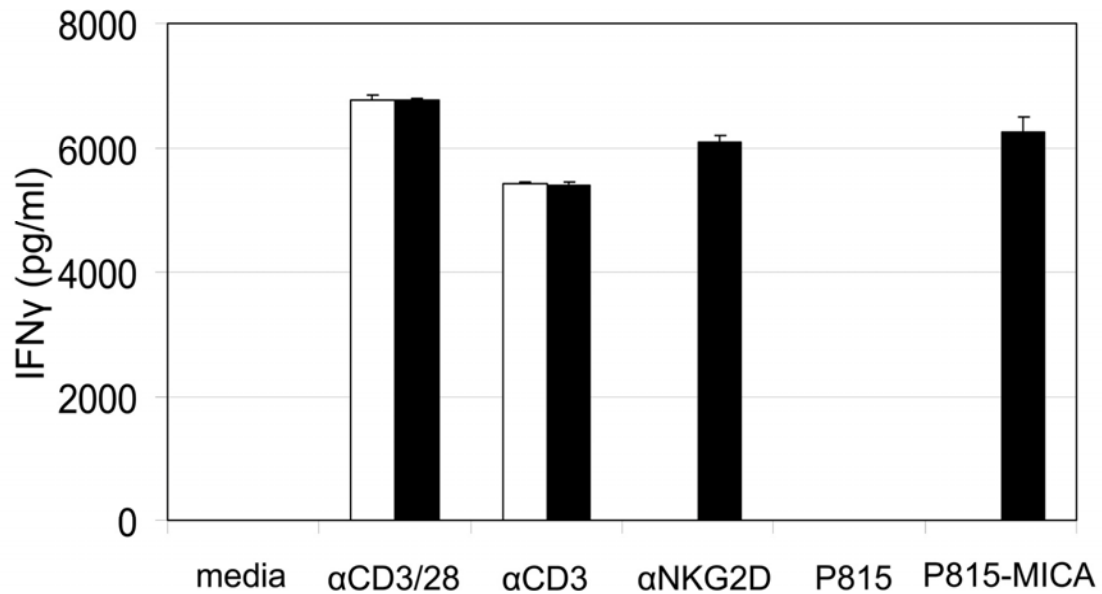

**Figure S5. chNKG2D T cells produce similar amounts of IFN $\gamma$  when activated with antibody-coated beads or NKG2D ligand-positive tumor cells**  
wtNKG2D (open bars) or chNKG2D (closed bars) T cells were stimulated with media, beads coated with anti-CD3/CD28, anti-CD3, or anti-NKG2D antibodies, or P815 or P815-MICA tumor cells for 24 hours. Secretion of IFN $\gamma$  was determined in cell-free supernatants by ELISA. Data are shown as mean + s.d. and were obtained from at least three donors.
